# Supplementary material
Source: PubMed Central journal article supplement (PMC99133)

# 1 Supplementary data to the Human Endogenous Retrovirus database (HERVd)

This example shows outputs of the search for repetitive elements in a small region of the human chromosome 12. Part 1.1. brings the numerical description of the repetitive elements found in this region. Part 1.2. is the graphical representation of the elements assembled into one member of the HERV-H family.

## 1.1 Part of unprocessed RepeatMasker output:

| SW score | perc div. | perc del. | perc ins. | query sequence | position in query |        |          | matching repeat | repeat class/family | position in repeat |      |        | ID    |
|----------|-----------|-----------|-----------|----------------|-------------------|--------|----------|-----------------|---------------------|--------------------|------|--------|-------|
|          |           |           |           |                | begin             | end    | (left)   |                 |                     | begin              | end  | (left) |       |
| ...      |           |           |           |                |                   |        |          |                 |                     |                    |      |        |       |
| 1003     | 20.0      | 0.0       | 1.6       | ctg18706       | 360341            | 360525 | (124660) | + HERVL         | LTR/ERV1            | 3321               | 3502 | (2262) | 827   |
| 864      | 23.4      | 0.0       | 1.2       | ctg18706       | 360928            | 361094 | (124091) | + MER41D        | LTR/ERV1            | 393                | 557  | (0)    | 829   |
| 589      | 18.2      | 1.0       | 0.0       | ctg18706       | 361099            | 361197 | (123988) | + HERVL         | LTR/ERV1            | 4611               | 4610 | (1164) | 827   |
| 899      | 16.2      | 1.4       | 0.0       | ctg18706       | 361372            | 361513 | (123672) | C MER4E         | LTR/ERV1            | (0)                | 779  | 636    | 831   |
| 1835     | 8.8       | 0.0       | 1.7       | ctg18706       | 361514            | 361752 | (123433) | C AluSg1        | SINE/Alu            | (16)               | 293  | 59     | 832   |
| 3465     | 6.0       | 0.4       | 1.1       | ctg18706       | 361755            | 362205 | (122980) | C LTR7          | LTR/ERV1            | (2)                | 448  | 1      | 877   |
| 8294     | 8.4       | 0.7       | 1.0       | ctg18706       | 362206            | 363322 | (121863) | C HERVH         | LTR/ERV1            | (0)                | 7713 | 6600   | 877   |
| 511      | 12.5      | 1.2       | 0.0       | ctg18706       | 363323            | 363402 | (121783) | C HERVH         | LTR/ERV1            | (1033)             | 6680 | 6600   | 877   |
| 521      | 11.2      | 1.2       | 0.0       | ctg18706       | 363403            | 363482 | (121703) | C HERVH         | LTR/ERV1            | (1033)             | 6680 | 6600   | 877   |
| 510      | 14.8      | 0.0       | 0.0       | ctg18706       | 363483            | 363563 | (121622) | C HERVH         | LTR/ERV1            | (1033)             | 6680 | 6600   | 877   |
| 511      | 16.1      | 0.0       | 0.0       | ctg18706       | 363564            | 363644 | (121541) | C HERVH         | LTR/ERV1            | (1033)             | 6680 | 6600   | 877   |
| 512      | 14.8      | 0.0       | 0.0       | ctg18706       | 363645            | 363725 | (121460) | C HERVH         | LTR/ERV1            | (1033)             | 6680 | 6600   | 877   |
| 479      | 15.0      | 1.2       | 0.0       | ctg18706       | 363726            | 363805 | (121380) | C HERVH         | LTR/ERV1            | (1033)             | 6680 | 6600   | 877   |
| 547      | 12.3      | 0.0       | 0.0       | ctg18706       | 363806            | 363886 | (121299) | C HERVH         | LTR/ERV1            | (1033)             | 6680 | 6600   | 877   |
| 527      | 14.8      | 0.0       | 0.0       | ctg18706       | 363887            | 363967 | (121218) | C HERVH         | LTR/ERV1            | (1033)             | 6680 | 6600   | 877   |
| 443      | 17.5      | 1.2       | 0.0       | ctg18706       | 363968            | 364047 | (121138) | C HERVH         | LTR/ERV1            | (1033)             | 6680 | 6600   | 877   |
| 518      | 13.6      | 0.0       | 0.0       | ctg18706       | 364048            | 364128 | (121057) | C HERVH         | LTR/ERV1            | (1033)             | 6680 | 6600   | 877   |
| 503      | 16.1      | 0.0       | 0.0       | ctg18706       | 364129            | 364209 | (120976) | C HERVH         | LTR/ERV1            | (1033)             | 6680 | 6600   | 877   |
| 506      | 16.1      | 0.0       | 0.0       | ctg18706       | 364210            | 364290 | (120895) | C HERVH         | LTR/ERV1            | (1033)             | 6680 | 6600   | 877   |
| 516      | 13.6      | 0.0       | 0.0       | ctg18706       | 364291            | 364371 | (120814) | C HERVH         | LTR/ERV1            | (1033)             | 6680 | 6600   | 877   |
| 434      | 18.8      | 1.2       | 0.0       | ctg18706       | 364372            | 364451 | (120734) | C HERVH         | LTR/ERV1            | (1033)             | 6680 | 6600   | 877   |
| 496      | 16.1      | 0.0       | 0.0       | ctg18706       | 364452            | 364532 | (120653) | C HERVH         | LTR/ERV1            | (1033)             | 6680 | 6600   | 877   |
| 520      | 14.8      | 0.0       | 0.0       | ctg18706       | 364533            | 364613 | (120572) | C HERVH         | LTR/ERV1            | (1033)             | 6680 | 6600   | 877   |
| 517      | 13.6      | 0.0       | 0.0       | ctg18706       | 364614            | 364694 | (120491) | C HERVH         | LTR/ERV1            | (1033)             | 6680 | 6600   | 877   |
| 411      | 19.2      | 1.3       | 0.0       | ctg18706       | 364697            | 364774 | (120411) | C HERVH         | LTR/ERV1            | (1035)             | 6678 | 6600   | 877   |
| 527      | 13.6      | 0.0       | 0.0       | ctg18706       | 364775            | 364855 | (120330) | C HERVH         | LTR/ERV1            | (1033)             | 6680 | 6600   | 877   |
| 526      | 13.6      | 0.0       | 0.0       | ctg18706       | 364856            | 364936 | (120249) | C HERVH         | LTR/ERV1            | (1033)             | 6680 | 6600   | 877   |
| 526      | 13.6      | 0.0       | 0.0       | ctg18706       | 364937            | 365017 | (120168) | C HERVH         | LTR/ERV1            | (1033)             | 6680 | 6600   | 877   |
| 517      | 13.6      | 0.0       | 0.0       | ctg18706       | 365018            | 365098 | (120087) | C HERVH         | LTR/ERV1            | (1033)             | 6680 | 6600   | 877   |
| 411      | 19.2      | 1.3       | 0.0       | ctg18706       | 365101            | 365178 | (120007) | C HERVH         | LTR/ERV1            | (1035)             | 6678 | 6600   | 877   |
| 2895     | 10.4      | 0.9       | 0.2       | ctg18706       | 365179            | 365619 | (119566) | C HERVH         | LTR/ERV1            | (1033)             | 6680 | 6237   | 877 * |
| 15432    | 16.7      | 1.7       | 2.9       | ctg18706       | 365599            | 365738 | (119447) | C HERVH         | LTR/ERV1            | (2372)             | 4157 | 4017   | 877   |
| 2421     | 8.4       | 0.3       | 0.0       | ctg18706       | 365739            | 366049 | (119136) | + AluSp         | SINE/Alu            | 2                  | 313  | (0)    | 873   |
| 15432    | 16.7      | 1.7       | 2.9       | ctg18706       | 366050            | 370282 | (114903) | C HERVH         | LTR/ERV1            | (2512)             | 4017 | 1      | 877   |
| 3393     | 7.6       | 0.0       | 2.4       | ctg18706       | 370285            | 370743 | (114442) | C LTR7          | LTR/ERV1            | (2)                | 448  | 1      | 877   |
| 466      | 9.7       | 0.0       | 0.0       | ctg18706       | 370744            | 370805 | (114380) | C Alu           | SINE/Alu            | (255)              | 63   | 2      | 878   |
| 2378     | 16.5      | 9.6       | 6.3       | ctg18706       | 370830            | 370951 | (114234) | C MER4D         | LTR/ERV1            | (247)              | 625  | 509    | 879   |
| 1477     | 15.1      | 9.7       | 2.1       | ctg18706       | 370952            | 371230 | (113955) | C AluJb         | SINE/Alu            | (2)                | 300  | 1      | 880   |
| 2378     | 16.5      | 9.6       | 6.3       | ctg18706       | 371231            | 371712 | (113473) | C MER4D         | LTR/ERV1            | (363)              | 509  | 1      | 879   |
| 195      | 18.6      | 0.0       | 0.0       | ctg18706       | 371738            | 371780 | (113405) | + (TA)n         | Simple_repeat       | 1                  | 43   | (0)    | 881   |
| 629      | 16.7      | 12.5      | 0.0       | ctg18706       | 371805            | 371924 | (113261) | C AluJc         | SINE/Alu            | (175)              | 137  | 3      | 882   |
| ...      |           |           |           |                |                   |        |          |                 |                     |                    |      |        |       |

## 1.2 Graphical representation of one member of the HERV-H family

Corresponding parts of the chromosome sequence and the family consensus sequence are connected. The height of boxes on the chromosome shows Swiss-Waterman score (SW). Blue and orange colors are used for internal and LTR sequences, respectively. Amplification of a small region, several deletions and insertions of unrelated elements are well recognized. The unrelated repetitive elements found by RepetMasker are in red.

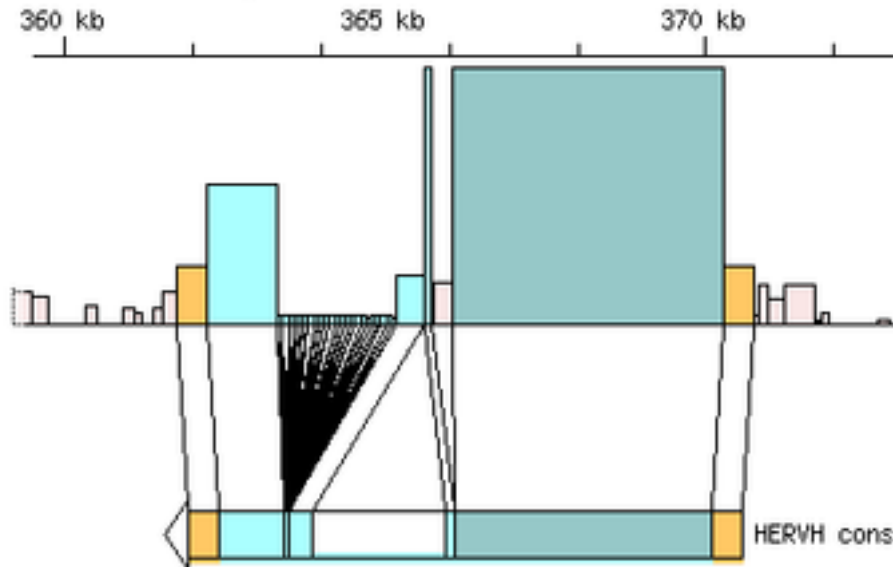

Supplement: nar_30_1_205__1.pdf [file nar_30_1_205__1.pdf]
